# Supplementary material for: Efficacy of Rifaximin Combined with Probiotics in the Treatment of Functional Diarrhea: A Prospective Cohort Study
Source: Research Square preprint supplement (doi:10.21203/rs.3.rs-8650251/v1), 2026-02-09
Supplement: Supplementary file 1 [file e6426471cee913c77fd52002.pdf]

# **Functional Diarrhea Patient Symptom Questionnaire**

**(For clinical assessment of symptom changes at different treatment stages)**

This questionnaire is used to assess gastrointestinal symptoms in patients with functional diarrhea. Please complete the questionnaire according to your condition **at the current treatment stage**.

## **Section I. Basic Information**

Patient ID (or Name): \_\_\_\_\_

Sex: ☐ Male ☐ Female

Age (years): \_\_\_\_\_

Height (cm): \_\_\_\_\_

Weight (kg): \_\_\_\_\_

Date of first visit: \_\_\_\_\_

Duration of diarrhea (years): \_\_\_\_\_

### **Treatment stage (please select one):**

☐ A. Before medication

☐ B. At the end of treatment

☐ C. 1 month after the end of treatment

## **Section II. Medical History and Lifestyle Factors**

Smoking history: ☐ Yes ☐ No

Alcohol consumption: ☐ Yes ☐ No

History of hypertension: ☐ Yes ☐ No

History of diabetes mellitus: ☐ Yes ☐ No

History of cholecystectomy: ☐ Yes ☐ No

### **Section III. Bowel Habits**

*(Based on the average condition over the past 3 days)*

#### **1. Average number of bowel movements per day:**

\_\_\_\_\_ times/day

#### **2. Stool consistency**

*(Please select the option that best matches your stool form, according to the Bristol Stool Form Scale)*

- ☐ Type 1 Separate hard lumps, like nuts (hard to pass)
- ☐ Type 2 Sausage-shaped but lumpy
- ☐ Type 3 Like a sausage but with cracks on the surface
- ☐ Type 4 Like a sausage or snake, smooth and soft
- ☐ Type 5 Soft blobs with clear-cut edges (passed easily)
- ☐ Type 6 Fluffy pieces with ragged edges, a mushy stool
- ☐ Type 7 Watery, no solid pieces, entirely liquid

### **Section IV. Severity of Defecation-Related Symptoms**

*Severity grading:*

0 = Not at all

1 = Mild

2 = Moderate

3 = Severe

4 = Very severe

**3. Urgency of defecation:**

☐ 0   ☐ 1   ☐ 2   ☐ 3   ☐ 4

**4. Sensation of incomplete evacuation:**

☐ 0   ☐ 1   ☐ 2   ☐ 3   ☐ 4

**Section V. Other Gastrointestinal Symptoms**

*(Whether the following symptoms occurred during the past 3 days)*

**5. Frequent flatulence:**

☐ Yes   ☐ No

**6. Borborygmi (noticeable bowel sounds):**

☐ Yes   ☐ No

**7. Mucus in stool:**

☐ Yes   ☐ No

**8. Frothy stool:**

☐ Yes   ☐ No

**Section VI. Overall Bowel Satisfaction**

**9. Overall satisfaction with current bowel habits:**

☐ 1   Very dissatisfied

☐ 2   Dissatisfied

☐ 3   Neutral

☐ 4   Satisfied

☐ 5   Very satisfied

**Notes for Clinical Use**

Higher stool frequency, looser stool form (BSFS type 6–7), higher symptom severity scores, and the presence of associated gastrointestinal symptoms indicate more severe disease status.

This questionnaire is intended for repeated use at different treatment stages to evaluate symptom changes over time.
